# Supplementary material for: Signaling Pathway and Small-Molecule Drug Discovery of FGFR: A Comprehensive Review
Source: PubMed Central journal article supplement (PMC9046545; doi:10.3389/fchem.2022.860985), 2022-04-14
Supplement: DataSheet1.pdf [file DataSheet1.pdf]

---

## **Appendix.**

### **Signaling pathway and small-molecule drug discovery of FGFR: A comprehensive review**

**Jia Zheng<sup>1</sup>, Wei Zhang<sup>1</sup>, Linfeng Li<sup>1</sup>, Yi He<sup>1</sup>, Yue Wei<sup>1</sup>, Yongjun  
Dang<sup>1</sup>, Shenyue Nie<sup>1,2\*</sup>, Zufeng Guo<sup>1,2\*</sup>**

<sup>1</sup>Center for Novel Target and Therapeutic Intervention, Institute of Life Sciences, Chongqing Medical University, Chongqing, China.

**\*Correspondence:**

Shenyue Nie, [nieshenyue@cqmu.edu.cn](mailto:nieshenyue@cqmu.edu.cn);  
Zufeng Guo, [zfguo@cqmu.edu.cn](mailto:zfguo@cqmu.edu.cn)

**Appendix A. Summary of FGFR inhibitors**

| <b>Name</b>                           | <b>Target</b>                            | <b>Indication</b>                         | <b>Clinical stage</b>                                            | <b>Company or Sponsor</b>                                                    | <b>IC<sub>50</sub> *</b>                     | <b>References</b>        |
|---------------------------------------|------------------------------------------|-------------------------------------------|------------------------------------------------------------------|------------------------------------------------------------------------------|----------------------------------------------|--------------------------|
| Ponatinib<br>(AP24534)                | Abl, PDGFR $\alpha$ ,<br>VEGFR, FGFR1    | Lung cancer<br>Acute and chronic leukemia | Phase 2 (NCT01935336)<br>Phase 1/2 (NCT02398825;<br>NCT02428543) | Ariad Pharmaceuticals                                                        | FGFR1, IC <sub>50</sub> =2.2 nM              | (O'Hare et al., 2009)    |
| Nintedanib<br>(BIBF1120)              | VEGFR, FGFR,<br>PDGFR                    | Advanced pancreatic cancer                | Phase 1/2 (NCT02902484)                                          | Boehringer Ingelheim                                                         | FGFR1/2/3,<br>IC <sub>50</sub> =69/37/108 nM | (Hilberg et al., 2008)   |
| Dovitinib<br>(TKI25)                  | c-Kit, VEGFR,<br>PGFR, FLT,<br>FGFR1/2/3 | Hormone refractory prostate<br>cancer     | Phase 2 (NCT01741116)                                            | Novartis Pharmaceuticals                                                     | FGFR1/3, IC <sub>50</sub> =8/9 nM            | (Trudel et al., 2005)    |
| S49076                                | MET, AXL,<br>FGFR1/2/3                   | Advanced solid tumors                     | NA *                                                             | Oncology Research and<br>Development Unit, Institut de<br>Recherches Servier | FGFR1/2/3, IC <sub>50</sub> =18 nM           | (Burbridge et al., 2013) |
| Orantinib<br>(TSU-68,<br>SU6668)      | VEGFR-2, FGFR,<br>PGFR                   | Hepatocellular carcinoma                  | Phase 3 (NCT01465464)                                            | Taiho Pharmaceutical<br>Co., Ltd.                                            | FGFR1, K <sub>i</sub> =1.2 $\mu$ M           | (Laird et al., 2000)     |
| Lenvatinib<br>(E7080)                 | RET, VEGFR, KDR,<br>FLT, FGFR            | Relapsed or refractory solid<br>tumors    | Phase 2 (NCT04447755)                                            | Eisai Inc.<br>Merck Sharp & Dohme Corp.                                      | FGFR1, IC <sub>50</sub> =46 nM               | (Matsui et al., 2008)    |
| Brivanib<br>Alaninate<br>(BMS-582664) | VEGFR, Flk1,<br>VEGFR, FGFR              | Cervical cancer                           | Phase 2 NCT04395612                                              | Bristol-Myers Squibb                                                         | FGFR1, IC <sub>50</sub> =148 nM              | (Bhide et al., 2006)     |
| Brivanib<br>(BMS-540215)              | VEGFR, FGFR 1                            | Cervical cancer                           | Phase 3 (NCT04395612)                                            | Bristol-Myers Squibb                                                         | FGFR1, IC <sub>50</sub> =148 nM              | (Bhide et al., 2006)     |

|                             |                                                                            |                                                             |                            |                                                                                                                                      |                                             |                           |
|-----------------------------|----------------------------------------------------------------------------|-------------------------------------------------------------|----------------------------|--------------------------------------------------------------------------------------------------------------------------------------|---------------------------------------------|---------------------------|
| Lucitanib<br>(E3810)        | VEGFR, FGFR2,<br>PDGFR                                                     | Solid tumors                                                | Phase 1/2 (NCT01283945)    | Eisai Inc.                                                                                                                           | FGFR1/2,<br>IC <sub>50</sub> =17.5/ 82.5 nM | (Bello et al., 2011)      |
| SKLB 610                    | VEGFR2, FGFR2,<br>PDGFR                                                    | Non-small cell lung cancer                                  | Preclinical study          | State Key Laboratory of<br>Biotherapy and Cancer Center,<br>West China Hospital, West<br>China Medical School,<br>Sichuan University | Inhibition rate (10 μM) =<br>65%            | (Cao et al., 2011)        |
| SSR128129E                  | FGFR                                                                       | Behcet's disease                                            | Phase 3 (NCT04528082)      | Amgen                                                                                                                                | FGFR, IC <sub>50</sub> =1.9 μM              | (Bono et al., 2013)       |
| Sulfatinib<br>(HMPL-012)    | VEGFR1, VEGFR2,<br>VEGFR3,<br>FGFR1, FMS                                   | Tumor                                                       | Early Phase1 (NCT03627520) | Hutchison Medipharma<br>Limited                                                                                                      | FGFR1, IC <sub>50</sub> =15 nM              | (J. M. Xu et al., 2017)   |
| Pazopanib<br>(GW786034)     | VEGFR1,<br>VEGFR2/3,<br>PDGFR, FGFR,<br>c-Kit, c-fms                       | Medical treatment for<br>metastatic renal cell<br>carcinoma | NCT04659343                | Frede Donskov Odense<br>University Hospital Herlev<br>Hospital Rigshospitalet<br>Denmark University of Aarhus                        | FGFR, IC <sub>50</sub> =74 nM               | (Harris et al., 2008)     |
| Danuseritib<br>(PHA-739358) | AuroraA/B/C, Abl,<br>TrkA, c-RET, FGFR1                                    | Multiple myeloma                                            | Phase 2 (NCT00872300)      | Nerviano Medical Sciences                                                                                                            | FGFR1, IC <sub>50</sub> =47 nM              | (Carpinelli et al., 2007) |
| ENMD-2076                   | AuroraA, FLT3,<br>RET, SRC, NTRK1,<br>FMS, VEGFR2,<br>FGFR, PDGFR $\alpha$ | Ovarian clear cell carcinoma                                | Phase 2 (NCT01914510)      | University Health Network,<br>Toronto                                                                                                | FGFR1, IC <sub>50</sub> =92.7 nM            | (Fletcher et al., 2011)   |
| MK-2461                     | c-Met, Ron,<br>FLT1/3/4,<br>FGFR1/2/3,<br>PDGFR $\beta$ , KDR              | c-Met and FGFR2-driven<br>tumors                            | Phase 1 (NCT00518739)      | Merck Sharp & Dohme Corp.                                                                                                            | FGFR1/2/3,<br>IC <sub>50</sub> =65/39/50 nM | (Pan et al., 2010)        |

|                              |                           |                                                                                                      |                       |                                                                      |                                                          |                          |
|------------------------------|---------------------------|------------------------------------------------------------------------------------------------------|-----------------------|----------------------------------------------------------------------|----------------------------------------------------------|--------------------------|
| Tyrphostin<br>AG 1296        | PDGFR, FGFR,<br>c-Kit     | Cancers                                                                                              | Preclinical study     | NA                                                                   | FGFR (Swiss 3T3),<br>IC <sub>50</sub> = 12.3 μM          | (Kovalenko et al., 1994) |
| ON123300                     | PDGFRβ, FGFR,<br>RET, Fyn | Solid tumors, adult (Carpinelli<br>et al., 2007)                                                     | Phase 1 (NCT04739293) | Onconova Therapeutics, Inc.                                          | FGFR1, IC <sub>50</sub> =26 nM                           | (X. Zhang et al., 2014)  |
| SU 5402                      | VEGFR2, FGFR1,<br>PDGFRβ  | Cancers                                                                                              | Preclinical study     | Department of Pharmacology,<br>New York University Medical<br>Center | FGFR1, IC <sub>50</sub> =30 nM                           | (Sun et al., 1999)       |
| Erdafitinib<br>(JNJ42756493) | FGFR1-4                   | Locally advanced or<br>metastatic bladder cancer, etc.                                               | Approved in 2019      | Janssen Research &<br>Development, LLC                               | FGFR1/2/3/4,<br>IC <sub>50</sub> =1.2/2.5/3.0/5.7 nM     | (Perera et al., 2017)    |
| ASP-5878                     | FGFR1-4                   | Solid tumors                                                                                         | Phase 1 (NCT02038673) | Astellas Pharma Inc                                                  | FGFR1/2/3/4, IC <sub>50</sub> =<br>0.47/0.6/0.74/0.74 nM | (Futami et al., 2017)    |
| Derazantinib<br>(ARQ-087)    | FGFR1-4                   | Advanced intrahepatic<br>cholangiocarcinoma with<br>FGFR2 Gene amplifications/<br>mutations/ fusions | Phase 2 (NCT03230318) | Basilea Pharmaceutica                                                | FGFR1/2/3/4,<br>IC <sub>50</sub> =4.5/1.8/4.5/34 nM      | (Hall et al., 2016)      |
| Rogaratinib<br>(BAY1163877)  | FGFR1-4                   | Neoplasms                                                                                            | Phase 1 (NCT03788603) | Bayer                                                                | FGFR1/2/3/4,<br>IC <sub>50</sub> =1.8/<1/9.2/1.2 nM      | (Grunewald et al., 2019) |
| FIIN-1                       | FGFR1-4                   | Drug-resistant tumors                                                                                | Preclinical study     | Harvard Medical School                                               | FGFR1/2/3/4, IC <sub>50</sub> =<br>9.2/6.2/11.9/182 nM   | (Zhou et al., 2010)      |
| FIIN-2                       | FGFR1-4                   | Drug-resistant tumors                                                                                | Preclinical study     | Harvard Medical School                                               | FGFR1/2/3/4, IC <sub>50</sub> =<br>3.09/4.3/27/45.3 nM   | (Tan et al., 2014)       |
| FIIN-3                       | FGFR1-4                   | Drug-resistant tumors                                                                                | Preclinical study     | Harvard Medical School                                               | FGFR1/2/3/4, IC <sub>50</sub> =<br>13.1/21/31.4/35.3 nM  | (Tan et al., 2014)       |
| LY2874455                    | FGFR1-4                   | Advanced cancer                                                                                      | Phase 1 (NCT01212107) | Eli Lilly                                                            | FGFR1/2/3/4,<br>IC <sub>50</sub> =2.8/2.6/6.4/6 nM       | (G. Zhao et al., 2011)   |

|                          |           |                                                         |                         |                                        |                                                                                             |                                                                                                               |
|--------------------------|-----------|---------------------------------------------------------|-------------------------|----------------------------------------|---------------------------------------------------------------------------------------------|---------------------------------------------------------------------------------------------------------------|
| PRN-1371                 | FGFR1-4   | Metastatic urothelial carcinoma & renal pelvis & ureter | Phase 1 (NCT02608125)   | Principia Biopharma, a Sanofi Company  | FGFR1/2/3/4, IC <sub>50</sub> =0.6/1.3/4.1/19.3 nM                                          | (Brameld et al., 2017)                                                                                        |
| Futibatinib (TAS-120)    | FGFR1-4   | Metastatic breast cancer with FGFR2 amplification       | Phase 2 (NCT04024436)   | Taiho Oncology, Inc.                   | FGFR1/2/3/4, IC <sub>50</sub> =1.8/1.4/1.6/3.7 nM                                           | (Sootome et al., 2020)                                                                                        |
| ICP-192                  | FGFR1-4   | Urothelial carcinoma, cholangiocarcinoma                | Phase 1/2 (NCT04565275) | Beijing InnoCare Pharma Tech Co., Ltd. | NA                                                                                          | <a href="https://clinicaltrials.gov/ct2/show/NCT04565275">https://clinicaltrials.gov/ct2/show/NCT04565275</a> |
| Pemigatinib (INCB054828) | FGFR1/2/3 | Unresectable or metastatic cholangiocarcinoma           | Approved in 2020        | Incyte Corporation                     | FGFR1/2/3/4, IC <sub>50</sub> =0.4/0.5/1.2/30 nM                                            | (Roskoski, 2020)                                                                                              |
| Infigratinib (BGJ398)    | FGFR1/2/3 | Advanced or metastatic cholangiocarcinoma               | Approved in 2021        | BridgeBio Pharma                       | FGFR1/2/3/4, IC <sub>50</sub> =0.9/1.4/1.0/60 nM<br>FGFR3 (K650E), IC <sub>50</sub> =4.9 nM | (Guagnano et al., 2011)                                                                                       |
| AZD4547                  | FGFR1/2/3 | ER+ breast cancer                                       | Phase 2/3 (NCT01202591) | AstraZeneca                            | FGFR1/2/3, IC <sub>50</sub> =0.2/2.5/8 nM                                                   | (Gavine et al., 2012)                                                                                         |
| CPL304110                | FGFR1/2/3 | Advanced solid malignancies                             | Phase 1 (NCT04149691)   | Celon Pharma S.A.                      | FGFR1/2/3/4, IC <sub>50</sub> =0.75/0.50/3.05/87.9 nM                                       | (Yamani et al., 2021)                                                                                         |
| Zoligratinib (Debio1347) | FGFR1/2/3 | Solid malignancies                                      | Phase 1 (NCT01948297)   | Debiopharm International SA            | FGFR1/2/3/4, IC <sub>50</sub> =9.3/7.622/290 nM                                             | (Nakanishi et al., 2014)                                                                                      |

|                         |           |                                                             |                                                |                                             |                                                                                                                                                    |                                                                                                                       |
|-------------------------|-----------|-------------------------------------------------------------|------------------------------------------------|---------------------------------------------|----------------------------------------------------------------------------------------------------------------------------------------------------|-----------------------------------------------------------------------------------------------------------------------|
| E7090                   | FGFR1/2/3 | Cholangiocarcinoma                                          | Phase 1 (NCT04565574)<br>Phase 2 (NCT04238715) | Eisai Co., Ltd.                             | FGFR1/2/3/4, IC <sub>50</sub> =<br>0.71/0.50/1.2/120 nM<br>FGFR3 (K650E),<br>IC <sub>50</sub> =3.1 nM<br>FGFR3 (K650M),<br>IC <sub>50</sub> =16 nM | (Watanabe Miyano et al.,<br>2016)                                                                                     |
| 3D185                   | FGFR1/2/3 | Advanced solid tumors,<br>Cholangiocarcinoma                | Phase 1 (NCT04221204)<br>Phase 2 (NCT05039892) | 3D Medicines Co., Ltd.                      | FGFR1/2/3, IC <sub>50</sub> =<br>0.5/1.3/3.6 nM                                                                                                    | (Peng et al., 2019)                                                                                                   |
| BLU9931                 | FGFR 4    | Hepatocellular carcinoma                                    | Preclinical study                              | Blueprint Medicines<br>Corporation          | FGFR4, IC <sub>50</sub> =3 nM                                                                                                                      | (Hagel et al., 2015)                                                                                                  |
| Fisogatinib<br>(BLU554) | FGFR 4    | Advanced solid tumors,<br>Hepatocellular carcinoma<br>(HCC) | Phase 1b/2<br>(NCT04194801)                    | Blueprint Medicines<br>Corporation          | FGFR4, IC <sub>50</sub> =5 nM<br>(FGFR1-3, IC <sub>50</sub> =624-<br>2203 nM)                                                                      | Blueprint Medicines.<br>50th th international liver<br>congress. 2015                                                 |
| FGF401                  | FGFR 4    | Solid malignancies,<br>Hepatocellular carcinoma<br>(HCC)    | Phase 1/2 (NCT02325739)                        | Novartis Pharmaceuticals                    | FGFR4, IC <sub>50</sub> =1.1 nM                                                                                                                    | (Fairhurst et al., 2020)                                                                                              |
| H3B-6527                | FGFR 4    | Advanced hepatocellular<br>carcinoma                        | Phase 1 (NCT02834780)                          | H3 Biomedicine, Cambridge,<br>Massachusetts | FGFR4, IC <sub>50</sub> < 1.2 nM                                                                                                                   | (Joshi et al., 2017)                                                                                                  |
| ICP-105                 | FGFR 4    | Advanced Solid Malignancies                                 | Phase 1 (NCT03642834)                          | Beijing InnoCare Pharma<br>Tech Co., Ltd.   | NA                                                                                                                                                 | <a href="https://www.clinicaltrials.gov/ct2/show/NCT0364283">https://www.clinicaltrials.gov/ct2/show/NCT0364283</a>   |
| EVER4010001             | FGFR 4    | Advanced Solid Tumors                                       | Phase 1/2 (NCT04699643)                        | Chinese PLA General<br>Hospital             | Combination With PD-1<br>Inhibitor Pembrolizumab                                                                                                   | <a href="https://www.clinicaltrials.gov/ct2/show/NCT04699643">https://www.clinicaltrials.gov/ct2/show/NCT04699643</a> |

|                    |                                              |                                                                  |                         |                                                                                                       |                                                      |                                                                                                                       |
|--------------------|----------------------------------------------|------------------------------------------------------------------|-------------------------|-------------------------------------------------------------------------------------------------------|------------------------------------------------------|-----------------------------------------------------------------------------------------------------------------------|
| Vofatamab (B-701)  | FGFR 3 (Anti-FGFR3 monoclonal antibody)      | Locally advanced or metastatic urothelial cell Carcinoma         | Phase 1/2 (NCT02401542) | Rainier Therapeutics                                                                                  | Combination With Pembrolizumab                       | <a href="https://www.clinicaltrials.gov/ct2/show/NCT03123055">https://www.clinicaltrials.gov/ct2/show/NCT03123055</a> |
| BO-264             | FGFR3-TACC3                                  | Specifically blocking the function of FGFR3-TACC3 fusion protein | Preclinical study       | Department of Molecular Biology and Genetics, Faculty of Science, Bilkent University, Ankara, Turkey. | NA                                                   | (Akbulut et al., 2020)                                                                                                |
| Masitinib (AB1010) | FGFR 3                                       | Multiple myeloma                                                 | Preclinical study       | AB Science                                                                                            | NA                                                   | (Dubreuil et al., 2009)                                                                                               |
| RLY4008            | FGFR 2                                       | Solid tumor                                                      | Phase 1 (NCT04526106)   | Relay Therapeutics, Inc.                                                                              | NA                                                   | <a href="https://clinicaltrials.gov/ct2/show/NCT04526106">https://clinicaltrials.gov/ct2/show/NCT04526106</a>         |
| Alofanib (RPT385)  | FGFR 2                                       | Ovarian cancer                                                   | Preclinical study       | Ruspharmtech LLC                                                                                      | allosteric FGFR2 inhibitor, IC <sub>50</sub> < 10 nM | (Tyulyandina et al., 2017)                                                                                            |
| NSC12              | FGFs (Small-Molecule extracellular FGF Trap) | Cancer                                                           | Preclinical study       | Department of Molecular and Translational Medicine, University of Brescia                             | FGF2, IC <sub>50</sub> =30 nM                        | (Ronca et al., 2015)                                                                                                  |
| Rosmarinic acid    | FGF2/FGFR-D2 complex                         | FGF2-mediated drug resistance                                    | Preclinical study       | RagonaIstituto di Scienze e Tecnologie Chimiche (SCITEC), CNR Institution                             | IC <sub>50</sub> =17.7 ±2.1 μM                       | (Pagano et al., 2021)                                                                                                 |
| PD-166866          | FGFR1                                        | Small cell lung cancer cell                                      | Preclinical study       | Warner-Lambert Company, Ann Arbor, Michigan, USA.                                                     | FGFR1, IC <sub>50</sub> = 52.4 nM                    | (Risuleo et al., 2009)                                                                                                |

|                     |             |                                                        |                                                  |                                                                                                                          |                                                                                                                                           |                           |
|---------------------|-------------|--------------------------------------------------------|--------------------------------------------------|--------------------------------------------------------------------------------------------------------------------------|-------------------------------------------------------------------------------------------------------------------------------------------|---------------------------|
| SU-4984             | FGFR1       | Malignant glioma and cancers                           | Preclinical study                                | State Key Laboratory of Biotherapy and Cancer Center, West China Hospital, West China Medical School, Sichuan University | FGFR1, IC <sub>50</sub> =20-40 μM                                                                                                         | (Mohammadi et al., 1997)  |
| Gambogenic acid     | FGFR        | Erlotinib-resistant non-small-cell lung cancer         | Preclinical study                                | Shanghai University of Traditional Chinese Medicine                                                                      | IC <sub>50</sub> of H1650 cells/HCC827 cells/HCC827ER cells = 0.909/1.328/1.51 μM                                                         | (L. Xu et al., 2018)      |
| Ferulic Acid        | FGFR1/2     | Melanoma                                               | Preclinical study                                | Zhejiang Provincial People's Hospital                                                                                    | FGFR1/2, IC <sub>50</sub> =3.78/12.5 μM                                                                                                   | (G. W. Yang et al., 2015) |
| Cediranib (AZD2171) | VEGFR, FGFR | Advanced solid tumor, FGFR positive lung cancer        | Phase 1 (NCT00979134)<br>Phase 2/3 (NCT02965378) | AstraZeneca                                                                                                              | FGFR1, IC <sub>50</sub> = 26 nM                                                                                                           | (Wedge et al., 2005)      |
| AT9283              | FGFR1/2/3   | Non-Hodgkins lymphoma<br>Unspecified adult solid tumor | Phase 1 (NCT00443976)                            | Astex Pharmaceuticals, Inc.                                                                                              | FGFR1/2/3, IC <sub>50</sub> = 10-30/1-10/1-30nM<br>FGFR1 (V561M), IC <sub>50</sub> =10-30 nM<br>FGFR2 (N549H), IC <sub>50</sub> =10-30 nM | (Howard et al., 2009)     |
| BZF-2               | EGFR, FGFR  | EGFR/FGFR1-positive NSCLC                              | Preclinical study                                | School of Pharmaceutical Science, Wenzhou Medical University,                                                            | NCI-H226, IC <sub>50</sub> = 2.11 μM<br>HCC827GR, IC <sub>50</sub> = 0.93 μM                                                              | (Xie et al., 2020)        |



|           |             |                                        |                       |                                                                                                         |                                                                                                  |                             |
|-----------|-------------|----------------------------------------|-----------------------|---------------------------------------------------------------------------------------------------------|--------------------------------------------------------------------------------------------------|-----------------------------|
| Ki23057   | VEGFR, FGFR | Drug-resistant gastric cancer          | Preclinical study     | Kirin Brewery Co.,Ltd.<br>(Gunma, Japan)                                                                | FGFR1/2,<br>IC <sub>50</sub> = 89/91 nM<br>VEGFR2, IC <sub>50</sub> = 38 nM                      | (Qiu et al., 2011)          |
| MPT0L145  | PI3K, FGFR  | Bladder cancer                         | Preclinical study     | Department of Pharmacology,<br>School of Medicine, College<br>of Medicine, Taipei Medical<br>University | FGFR-<br>dependent/independent,<br>IC <sub>50</sub> = 1.83/6.74 μM                               | (C. H. Chen et al., 2016)   |
| ODM-203   | VEGFR, FGFR | Solid tumors                           | Phase 1 (NCT02264418) | Orion Corporation Orion<br>Pharma, Finland                                                              | FGFR1/2/3/4,<br>IC <sub>50</sub> = 11/16/6/35 nM<br>VEGFR1/2/3,<br>IC <sub>50</sub> = 26 /9/5 nM | (Holmström et al., 2019)    |
| SOMCL-085 | VEGFR, FGFR | FGFR-driven cancers                    | Preclinical study     | Shanghai Institute of Materia<br>Medica                                                                 | FGFR1/2/3,<br>IC <sub>50</sub> = 1.8/1.9 /6.9 nM                                                 | (Jiang et al., 2018)        |
| SOMCL-286 | VEGFR, FGFR | FGFR1/2 and VEGFR2<br>addictive cancer | Preclinical study     | Shanghai Institute of Materia<br>Medica                                                                 | FGFR1/2/3,<br>IC <sub>50</sub> = 1.0/4.5/2.9 nM,                                                 | (M. Wei et al., 2018)       |
| PD173074  | VEGFR, FGFR | Non-small cell lung cancer<br>cell     | Preclinical study     | Department of Pharmacology,<br>New York University Medical<br>Center                                    | FGFR1, IC <sub>50</sub> = 1-5 nM<br>VEGFR2,<br>IC <sub>50</sub> = 100-200 nM                     | (Mohammadi et al.,<br>1998) |

FGF, fibroblast growth factor; FGFR, fibroblast growth factor receptor; VEGFR, vascular endothelial growth factor receptor; PI3K, phosphoinositide 3-kinase; EGFR, epidermal growth factor receptor; TACC, transforming acidic coiled-coil containing protein; PDGFR, platelet-derived growth factor receptor; RET, rearranged during transfection; Fyn, fyn proto-oncogene, src family tyrosine kinase; AXL, axl receptor tyrosine kinase; Flk, fetal liver kinase; FMS, colony-stimulating factor 1 receptor; Abl, Abl tyrosine kinase; AuroraA, aurora kinase A; SRC, src proto-oncogene, non-receptor tyrosine kinase; NTRK1, neurotrophic receptor tyrosine kinase; Ron, macrophage stimulating 1 receptor; KDR, kinase insert domain receptor; Flt, fms related receptor tyrosine kinase; Trk neurotrophic receptor tyrosine kinase; Kit, kit proto-oncogene receptor tyrosine kinase. \*IC<sub>50</sub>: The reference of IC<sub>50</sub> have been cited in the table. \*NA: Not available.

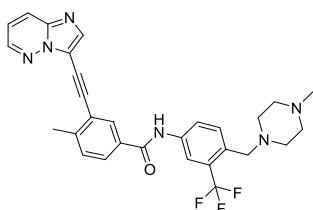

**Ponatinib, AP24534**  
 Abl, IC<sub>50</sub>=0.37 nM  
 PDGFR, IC<sub>50</sub>=1.1 nM  
 VEGFR2, IC<sub>50</sub>=1.5 nM  
 FGFR1, IC<sub>50</sub>=2.2 nM  
 Src, IC<sub>50</sub>=5.4 nM

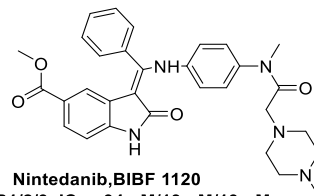

**Nintedanib, BIBF 1120**  
 VEGFR1/2/3, IC<sub>50</sub>=34 nM/13 nM/13 nM  
 FGFR1/2/3, IC<sub>50</sub>= 69 nM/37 nM/108 nM  
 PDGFR $\alpha/\beta$ , IC<sub>50</sub>=59 nM/65 nM

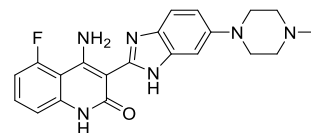

**Dovitinib, TKI258**  
 FLT3/c-Kit, IC<sub>50</sub>=1 nM/2 nM  
 FGFR1/3 and VEGFR1-4, IC<sub>50</sub>= 8-13 nM

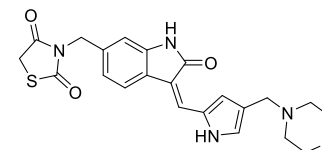

**S49076**  
 FGFR1/2/3, IC<sub>50</sub><20 nM

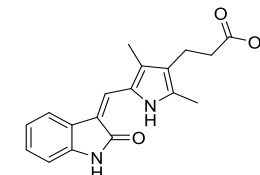

**Orantinib (TSU-68, SU6668)**  
 FGFR1, K<sub>i</sub> = 1.2  $\mu$ M

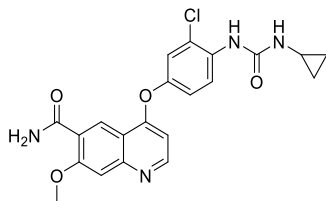

**Lenvatinib, E7080**  
 VEGFR2(KDR)/VEGFR3(Fit-4)  
 IC<sub>50</sub>=4 nM/5.2 nM  
 FGFR1-4, PDGFR, Kit (c-Kit), RET (c-RET)

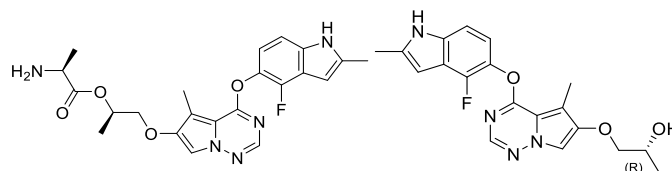

**BMS-582664**  
 FGFR1, IC<sub>50</sub>= 148 nM

**BMS-540215**  
 FGFR1, IC<sub>50</sub>= 148 nM

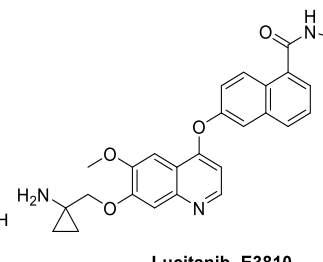

**Lucitanib, E3810**  
 FGFR1, IC<sub>50</sub>= 17.5 nM  
 FGFR2, IC<sub>50</sub>= 82.5 nM

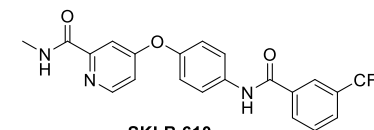

**SKLB 610**  
 Inhibiting FGFR2 at a rate of 65%, at the concentration of 10  $\mu$ M

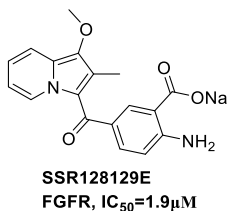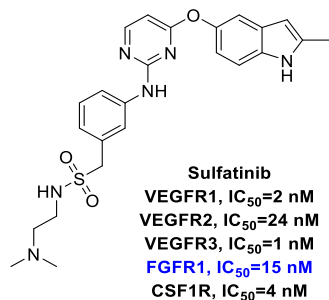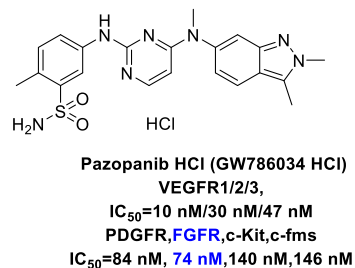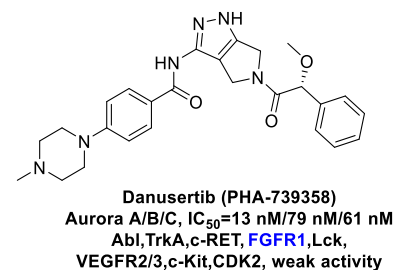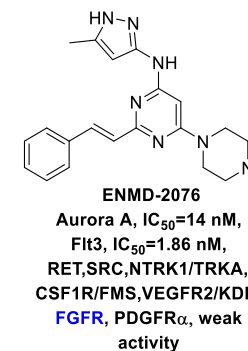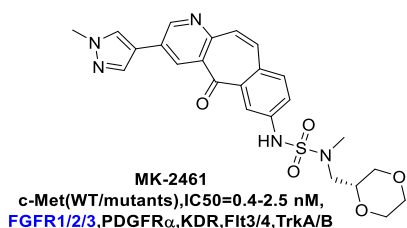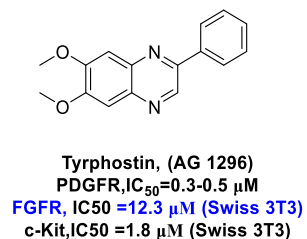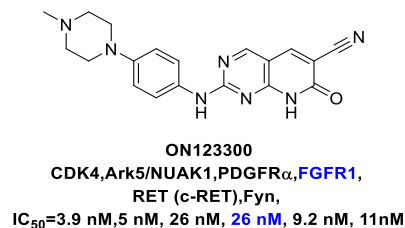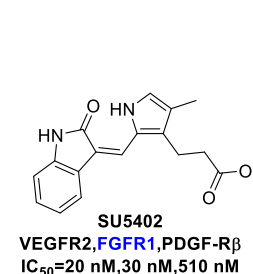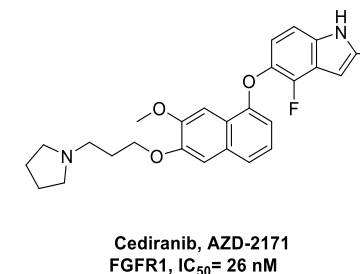

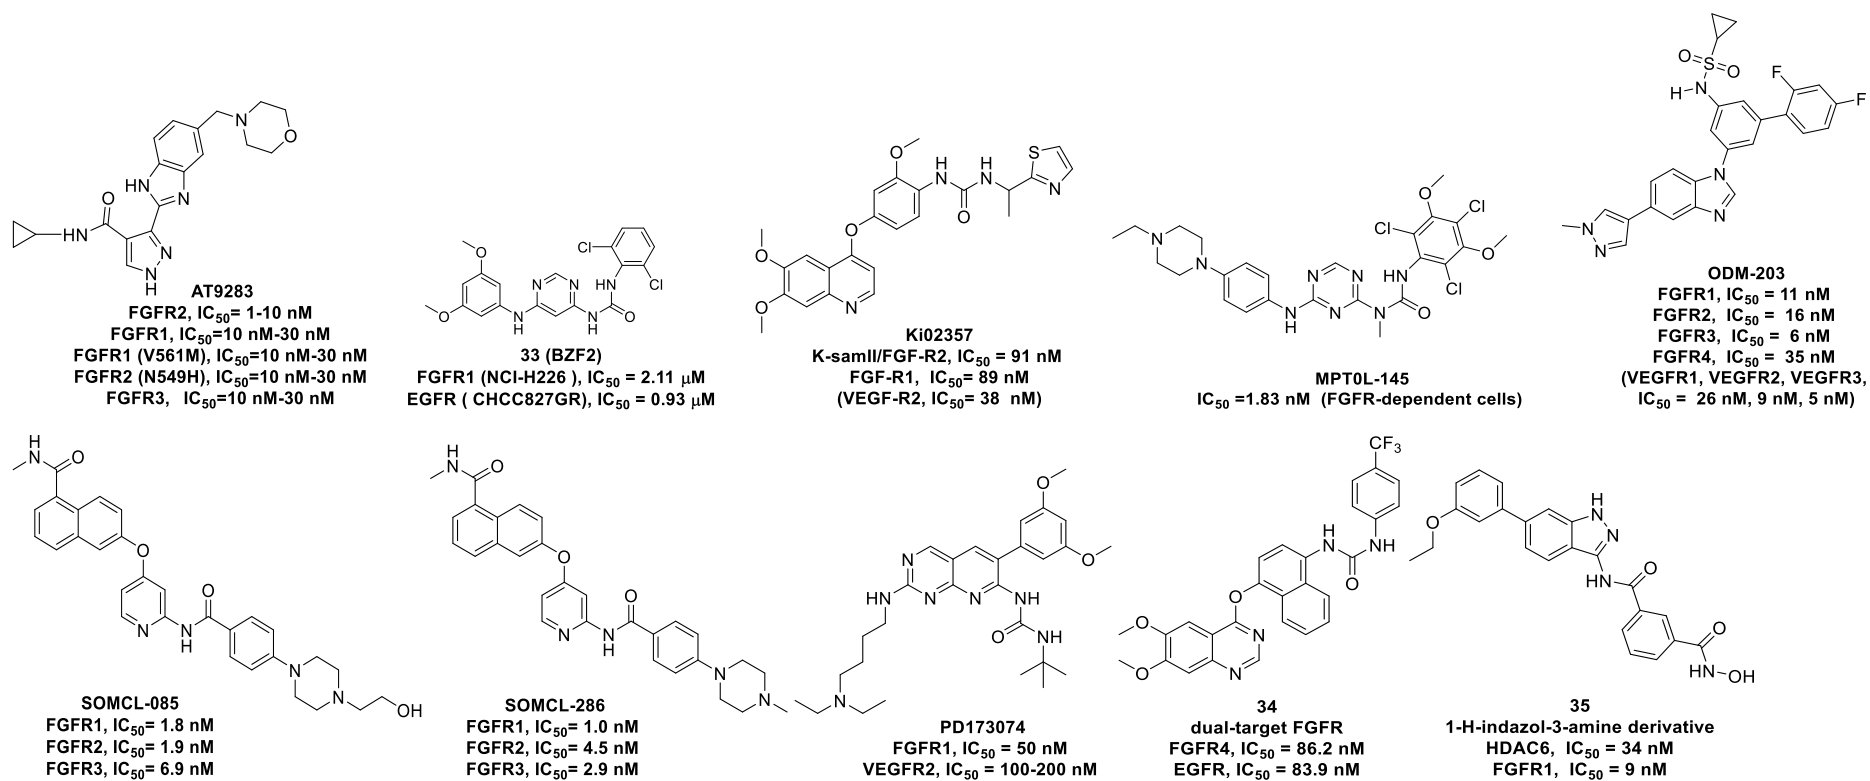

**Figure S1.** Reported multi-target or dual target FGFR inhibitors with targets and IC<sub>50</sub> values

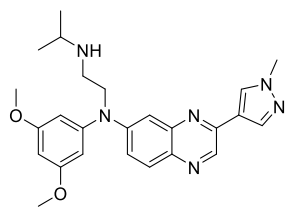

**Balversa(Erdafitinib,JNJ42756493)**

2019

FGFR1, IC<sub>50</sub>=1.2 nM  
 FGFR2, IC<sub>50</sub>=2.5 nM  
 FGFR3, IC<sub>50</sub>=3.0 nM  
 FGFR 4, IC<sub>50</sub>= 5.7 nM

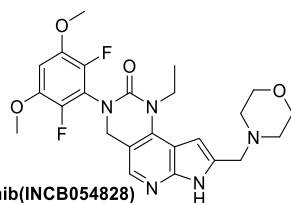

**Pemigatinib(incb054828)**

FGFR 1, IC<sub>50</sub>=0.4 nM  
 FGFR 2, IC<sub>50</sub>=0.5 nM  
 FGFR 3, IC<sub>50</sub>=1.2 nM  
 (FGFR 4, IC<sub>50</sub>=30 nM)

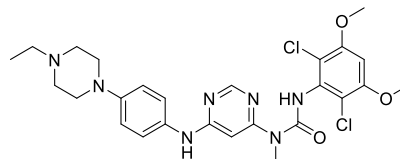

**Infigratinib(BGJ398)**

FGFR1, IC<sub>50</sub> =0.9 nM  
 FGFR2, IC<sub>50</sub> =1.4 nM  
 FGFR3, IC<sub>50</sub> =1.0 nM  
 (FGFR4, IC<sub>50</sub> = 60 nM)  
 FGFR3 (K650E), IC<sub>50</sub> =4.9 nM

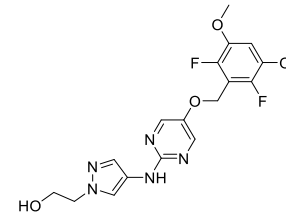

**ASP5878**

FGFR1, IC<sub>50</sub>=0.47nM  
 FGFR2, IC<sub>50</sub>=0.60nM  
 FGFR3, IC<sub>50</sub>=0.74nM  
 FGFR4, IC<sub>50</sub>= 0.74nM

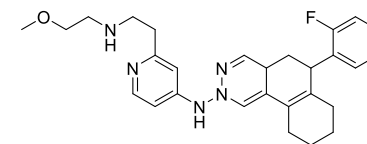

**ARQ-087**

FGFR1, IC<sub>50</sub>=4.5 nM  
 FGFR2, IC<sub>50</sub>=1.8 nM  
 FGFR3, IC<sub>50</sub>=4.5 nM  
 FGFR4, IC<sub>50</sub>= 34 nM

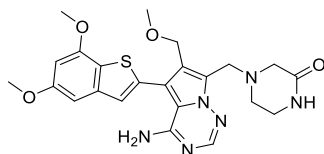

**Rogaratinib  
(BAY1163877)**

FGFR1, IC<sub>50</sub>=15 nM  
 FGFR2, IC<sub>50</sub>=1 nM  
 FGFR3, IC<sub>50</sub>=19 nM  
 FGFR4, IC<sub>50</sub>= 33 nM

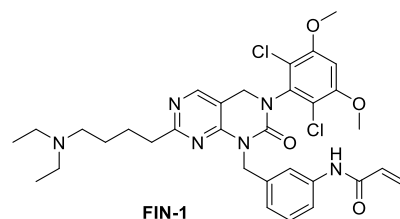

**FIN-1**

FGFR1, IC<sub>50</sub>=9.2 nM  
 FGFR2, IC<sub>50</sub>=6.2 nM  
 FGFR3, IC<sub>50</sub>=11.9 nM  
 FGFR4, IC<sub>50</sub>= 182 nM

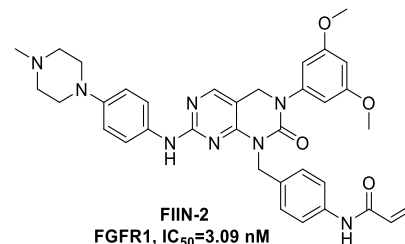

**FIIN-2**

FGFR1, IC<sub>50</sub>=3.09 nM  
 FGFR2, IC<sub>50</sub>=4.3 nM  
 FGFR3, IC<sub>50</sub>=27 nM  
 FGFR4, IC<sub>50</sub>=45.3 nM

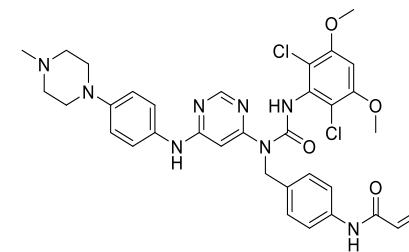

**FIIN-3**

FGFR1, IC<sub>50</sub>=13.1 nM  
 FGFR2, IC<sub>50</sub>=21 nM  
 FGFR3, IC<sub>50</sub>=31.4 nM  
 FGFR4, IC<sub>50</sub>= 35.3 nM

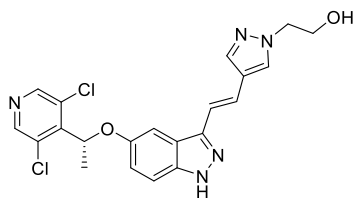

**LY287445**  
 FGFR1, IC<sub>50</sub>=2.8 nM  
 FGFR2, IC<sub>50</sub>=2.6 nM  
 FGFR3, IC<sub>50</sub>=6.4 nM  
 FGFR4, IC<sub>50</sub>=6 nM  
 VEGFR2, IC<sub>50</sub>=7 nM

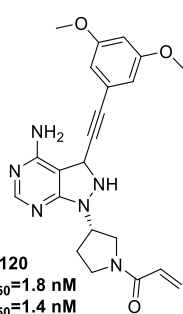

**TAS 120**  
 FGFR 1, IC<sub>50</sub>=1.8 nM  
 FGFR 2, IC<sub>50</sub>=1.4 nM  
 FGFR 3, IC<sub>50</sub>= 1.6 nM  
 FGFR 4, IC<sub>50</sub>=3.7 nM

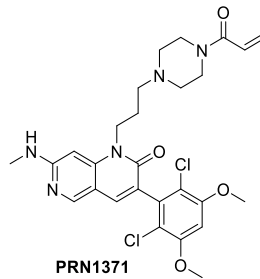

**PRN1371**  
 FGFR1, IC<sub>50</sub>=0.6 nM  
 FGFR2, IC<sub>50</sub>=1.3 nM  
 FGFR3, IC<sub>50</sub>=4.1nM  
 FGFR4, IC<sub>50</sub>=19.3 nM

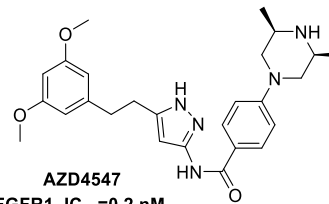

**AZD4547**  
 FGFR1, IC<sub>50</sub>=0.2 nM  
 FGFR2, IC<sub>50</sub>=2.5 nM  
 FGFR3, IC<sub>50</sub>=8 nM

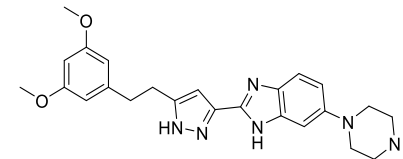

**CPL304110**  
 FGFR1, IC<sub>50</sub> = 0.75 nM  
 FGFR2, IC<sub>50</sub> = 0.50 nM  
 FGFR3, IC<sub>50</sub> = 3.05 nM  
 (FGFR4, IC<sub>50</sub> = 87.9 nM)

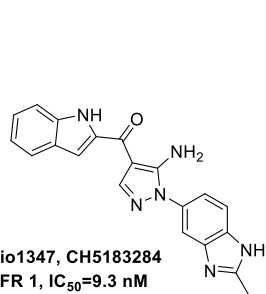

**Debio1347, CH5183284**  
 FGFR 1, IC<sub>50</sub>=9.3 nM  
 FGFR 2, IC<sub>50</sub>=7.6 nM  
 FGFR 3, IC<sub>50</sub>=22 nM  
 (FGFR 4, IC<sub>50</sub>=290 nM)

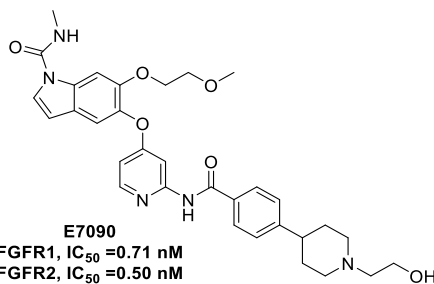

**E7090**  
 FGFR1, IC<sub>50</sub> =0.71 nM  
 FGFR2, IC<sub>50</sub> =0.50 nM  
 FGFR3, IC<sub>50</sub> =1.2 nM  
 (FGFR4, IC<sub>50</sub> = 120 nM)  
 FGFR3 (K650E), IC<sub>50</sub> =3.1 nM  
 FGFR3 (K650M) IC<sub>50</sub> =16 nM

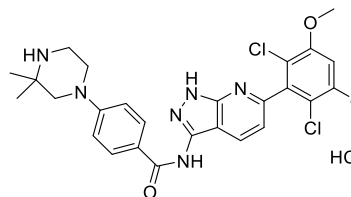

**3D185**  
 FGFR1, IC<sub>50</sub> = 0.5 nM  
 FGFR2, IC<sub>50</sub> = 1.3 nM  
 FGFR3, IC<sub>50</sub> = 13.6 nM

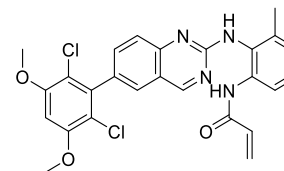

**BLU9931**  
 FGFR 4, IC<sub>50</sub>=3 nM

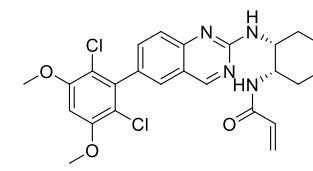

**BLU554**  
 FGFR4, IC<sub>50</sub>=5 nM  
 (FGFR1-3, IC<sub>50</sub>: 624-2203 nM)

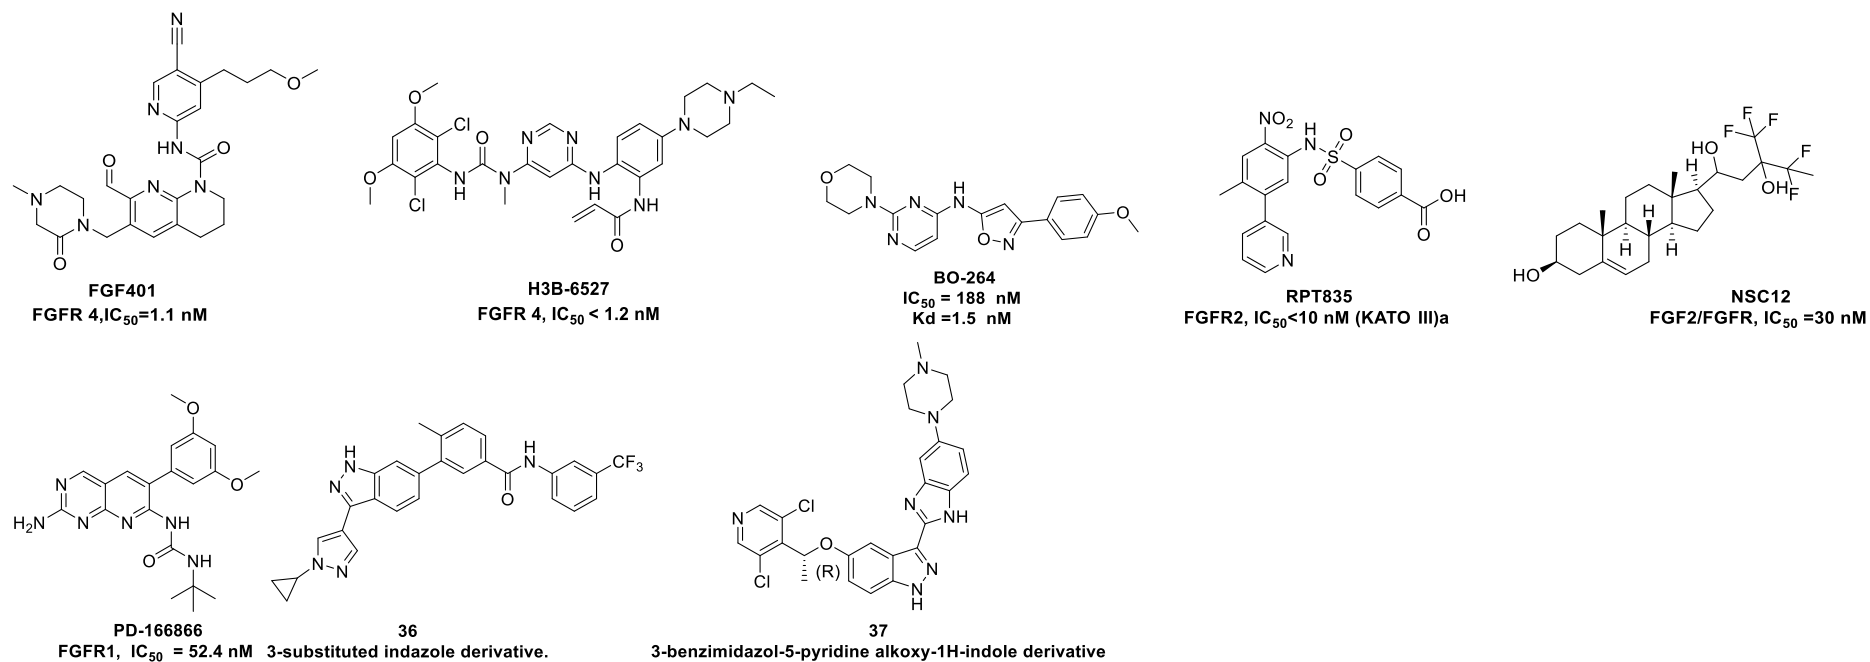

**Figure S2.** Reported Selective FGFR inhibitors and FGFR Traps

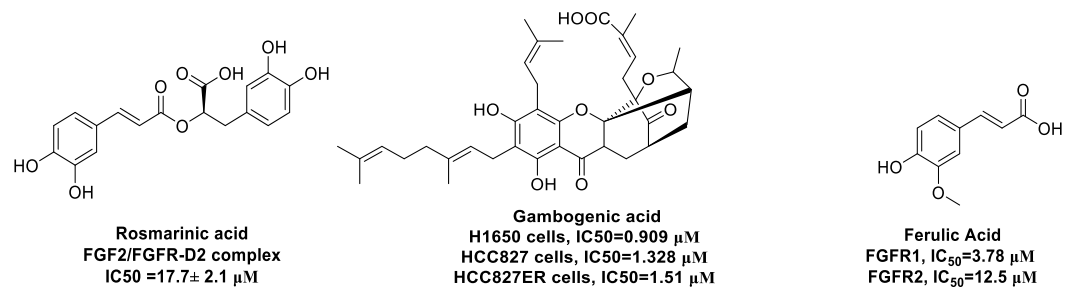

**Figure S3.** Represent extracellular FGFR inhibitor and selective FGFR inhibitors originated from natural products
